# Supplementary material for: Impact of sarcopenia in patients with advanced non–small cell lung cancer treated with PD-1 inhibitors: A preliminary retrospective study
Source: Springer Nature journal article supplement (doi:10.1038/s41598-019-39120-6), 2019-02-21

## **SUPPLEMENTARY INFORMATION**

### **Impact of sarcopenia in patients with advanced non–small cell lung cancer treated with PD-1 inhibitors: A preliminary retrospective study**

Takayuki Shiroyama\*, Izumi Nagatomo, Shohei Koyama, Haruhiko Hirata, Sumiyuki Nishida, Kotaro Miyake, Kiyoharu Fukushima, Yuya Shirai, Yuichi Mitsui, So Takata, Kentaro Masuhiro, Moto Yaga, Kota Iwahori, Yoshito Takeda, Hiroshi Kida & Atsushi Kumanogoh.

Department of Respiratory Medicine and Clinical Immunology, Graduate School of Medicine, Osaka University, Osaka, Japan

#### **Corresponding author:**

Takayuki Shiroyama, MD; E-mail: [takayuki.s12@hotmail.co.jp](mailto:takayuki.s12@hotmail.co.jp)

**Supplementary Figure S1.**

**Figure S1. Box plots representing the relationship between ECOG**

**performance status and psoas muscle index by sex. One male patient had**

**an ECOG PS of 3.**

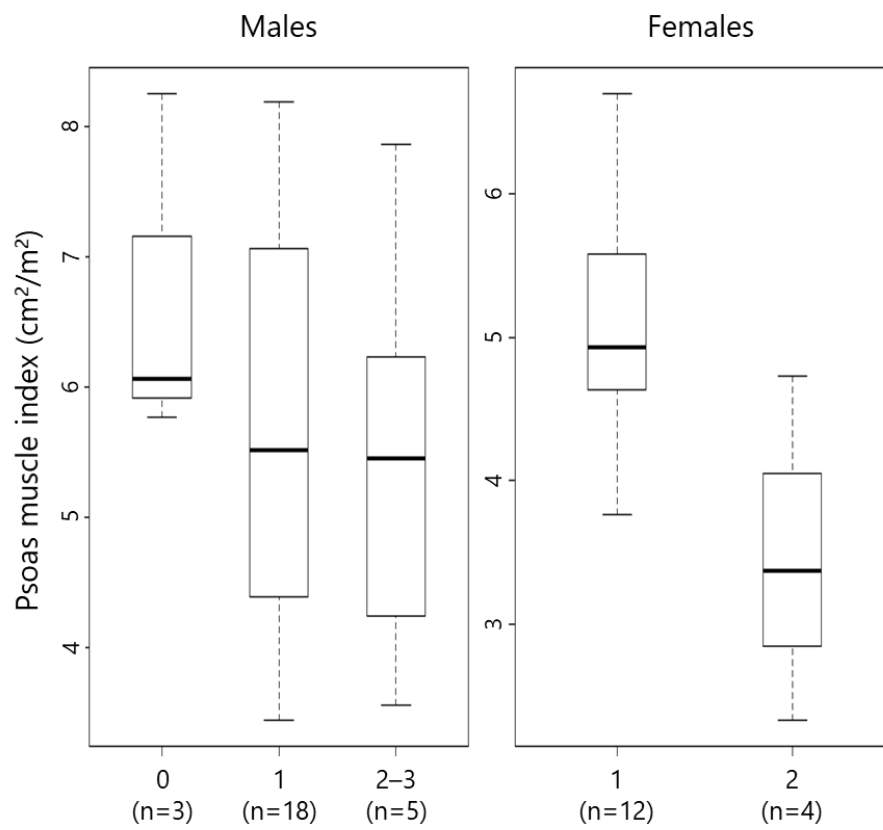

## Supplementary Figure S2.

### Figure S2. Kaplan-Meier curves of progression-free survival by PD-L1

**expression status.** PD-L1 expression was tested in 18 patients (42.9%) in this study.

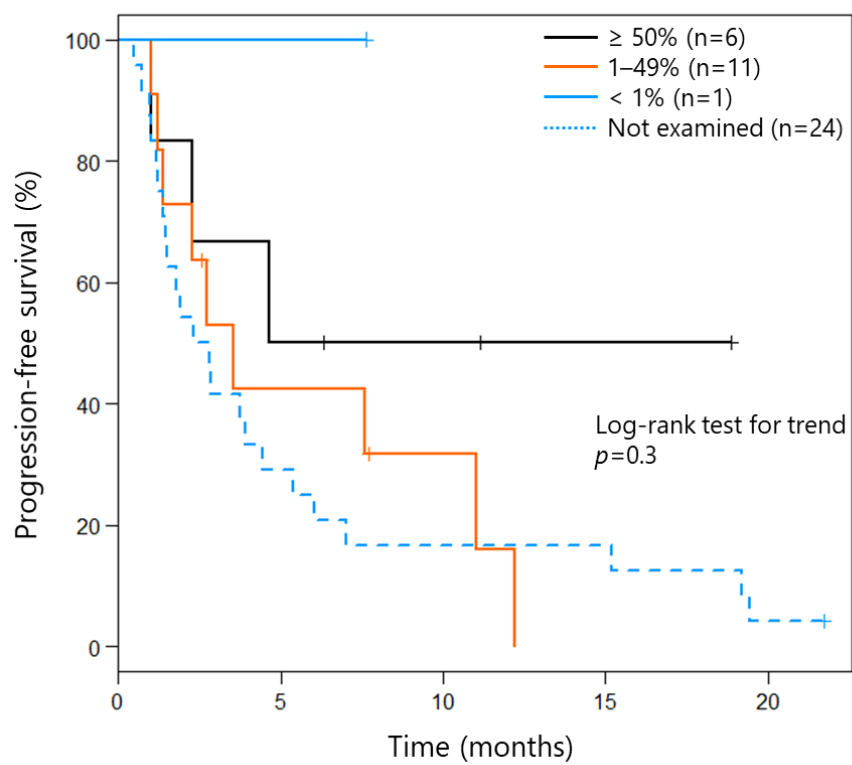

Supplement: 41598_2019_39120_MOESM1_ESM.pdf [file 41598_2019_39120_MOESM1_ESM.pdf]
